# Supplementary material for: Atf3 links loss of epithelial polarity to defects in cell differentiation and cytoarchitecture
Source: PubMed Central journal article supplement (PMC5849342; doi:10.1371/journal.pgen.1007241), 2018-03-01
Supplement: pgen.1007241.s012.pdf [file pgen.1007241.s012.pdf]

**Table S1. Summary of oligonucleotides**

| Oligonucleotides used (5' >3' sequence) |                                                                                                                                  |
|-----------------------------------------|----------------------------------------------------------------------------------------------------------------------------------|
| ATRE Reporter Oligos                    |                                                                                                                                  |
| ATRE For_Mlu1                           | cgcgTTGAAAAT <b>GACGTC</b> ACTGGGCGGAGACAAT <b>CACGTC</b> ATCCAGCCGGCGCG <b>TTACGTC</b> ATTTCATAATCGATGAT <b>GAGGTC</b> ATAACTAA |
| ATRE Rev_Not1                           | ggccTTAGTTAT <b>GACCTC</b> ATCATCGATTATGAAT <b>GACGTA</b> AGCGCGCCGGCTGGAT <b>GACGTG</b> ATTGTCTCCGCCAGT <b>GACGTC</b> ATTTTCAA  |
| mATRE_For_Mlu1                          | cgcgAGAGTCGACATGAGAGTCGACATGAGAGTCGACATGAGAGTCGACATGAGAGTCGACATG                                                                 |
| mATRE_Rev_Not1                          | ggccCATGTCGACTCTCATGTCGACTCTCATGTCGACTCTCATGTCGACTCT                                                                             |
| qRT-PCR                                 |                                                                                                                                  |
| rp49 For                                | tcctaccagcttcaagatgac                                                                                                            |
| rp49 Rev                                | cacgttgtgcaccaggaact                                                                                                             |
| atf3 iQ For                             | tggaggacatgctgaaatcgca                                                                                                           |
| atf3 iQ Rev                             | atgctgctggtcaatcacgttg                                                                                                           |
| dlg1 iQ For                             | gctgctcagcgtgaacaatgtcaa                                                                                                         |
| dlg1 iQ Rev                             | gggcagcctggtgtttcaactctt                                                                                                         |
| LamC ATRE 1 CHIP For                    | agctttcgcaacaaatgtgagtcg                                                                                                         |
| LamC ATRE 1 CHIP Rev                    | cctatttgctgagtaatcccttatcg                                                                                                       |
| LamC ATRE 2 CHIP For                    | gagtgacagagacagacagagaacg                                                                                                        |
| LamC ATRE 2 CHIP Rev                    | cagcgaaagagtcgagagagtttcc                                                                                                        |
| LamC ATRE 3 CHIP For                    | ggaggtcagtgctatatacactcgattta                                                                                                    |
| LamC ATRE 3 CHIP Rev                    | ctgtctcaacacacgctgtgagaa                                                                                                         |
| coracle ATRE CHIP For                   | gctcttgatattatgccttagctggtgc                                                                                                     |
| coracle ATRE CHIP Rev                   | cgaattgtcgatagcgcatagcgatt                                                                                                       |
| $\alpha$ Tub84B ATRE CHIP For           | gctgaaaagaaatttgtgtgggcaaa                                                                                                       |
| $\alpha$ Tub84B ATRE CHIP Rev           | taagagccattcctcattgcaaca                                                                                                         |
| ecd iQ For                              | acccaagaagctctacaagccgaa                                                                                                         |
| ecd iQ Rev                              | acctttgctgtcagtcctgtggaa                                                                                                         |
| $\alpha$ Tub84B iQ For                  | tcatagccggcagttcgaacgtat                                                                                                         |
| $\alpha$ Tub84B iQ Rev                  | acaccagcctgaccaacatggata                                                                                                         |
| $\beta$ Tub56D iQ For                   | ccagaacaagaacagctcctac                                                                                                           |
| $\beta$ Tub56D iQ Rev                   | cagtgaggattgccgatgaa                                                                                                             |
| arp1 iQ For                             | gctggagggcgacatattcgttg                                                                                                          |
| arp1 iQ Rev                             | ggtgacaatgccgtgctccatg                                                                                                           |

|                        |                                 |
|------------------------|---------------------------------|
| dynactin iQ For        | atataaattccttctcaccttcgtg       |
| dynactin iQ Rev        | cggtggcatattcctctatga           |
| ude iQ For             | gacatggagaaggcgtagag            |
| ude iQ Rev             | gctctctgtcttggcattct            |
| LamC iQ For            | caacctggagaacgagaaca            |
| LamC iQ Rev            | ctcatagaccgccttcagattag         |
| <b>Cloning primers</b> |                                 |
| atf3 cDNA For          | caccatggtcaattccaacataccggcctcc |
| atf3 cDNA Rev          | tcacgccaggcaactgcc              |
