# Supplementary material for: Atf3 links loss of epithelial polarity to defects in cell differentiation and cytoarchitecture
Source: PubMed Central journal article supplement (PMC5849342; doi:10.1371/journal.pgen.1007241), 2018-03-01
Supplement: pgen.1007241.s013.pdf [file pgen.1007241.s013.pdf]

**Table S2. Summary of fly crosses**

| ChIP-seq                                                                              |                                                              |
|---------------------------------------------------------------------------------------|--------------------------------------------------------------|
| ♀ <i>y w</i>                                                                          | x ♂ <i>w<sup>1118</sup></i>                                  |
| ♀ <i>y atf3<sup>76</sup> w/ FM7i, P{ActGFP}JMR3;; atf3<sup>sBAC</sup>/TM6B</i>        | x ♂ <i>w<sup>1118</sup></i>                                  |
| ChIP                                                                                  |                                                              |
| ♀ <i>w<sup>1118</sup></i>                                                             | x ♂ <i>y w</i>                                               |
| ♀ <i>w<sup>1118</sup></i>                                                             | x ♂ <i>y atf3<sup>76</sup> w;; atf3<sup>sBAC</sup>/TM6B</i>  |
| Wing Disc Expression                                                                  |                                                              |
| ♀ <i>w; en-GAL4; atf3<sup>sBAC</sup>/TM6B</i>                                         | x ♂ <i>w<sup>1118</sup></i>                                  |
| ♀ <i>w; en-GAL4; atf3<sup>sBAC</sup>/TM6B</i>                                         | x ♂ <i>w; UAS-dlg<sup>RNAi</sup></i>                         |
| ♀ <i>w; en-GAL4, UAS-mCherry ; atf3<sup>sBAC</sup>/TM6B</i>                           | x ♂ <i>w; UAS-scrib<sup>RNAi</sup></i>                       |
| ♀ <i>w; en-GAL4; atf3<sup>sBAC</sup>/TM6B</i>                                         | x ♂ <i>w; UAS-hep<sup>wt</sup>, TRE-dsRED</i>                |
| ♀ <i>w; en-GAL4; atf3<sup>sBAC</sup>/TM6B</i>                                         | x ♂ <i>w;; UAS-aPKC<sup>CAAX</sup></i>                       |
| ♀ <i>w; en-GAL4; atf3<sup>sBAC</sup>/TM6B</i>                                         | x ♂ <i>w;; UAS-aPKC<sup>CAAX</sup>, UAS-bsk<sup>DN</sup></i> |
| ♀ <i>w; ATRE-GFP, UAS-mCherry; dpp-GAL4/TM6B</i>                                      | x ♂ <i>w; UAS-atf3<sup>wt</sup></i>                          |
| ♀ <i>w; ATRE-GFP, UAS-mCherry; dpp-GAL4/TM6B</i>                                      | x ♂ <i>w; UAS-hep<sup>wt</sup></i>                           |
| ♀ <i>w; ATRE-GFP, UAS-mCherry; dpp-GAL4/TM6B</i>                                      | x ♂ <i>w;; UAS-aPKC<sup>CAAX</sup></i>                       |
| ♀ <i>w; ATRE-GFP, UAS-mCherry; dpp-GAL4/TM6B</i>                                      | x ♂ <i>w;; UAS-yki<sup>act</sup></i>                         |
| Mosaic analysis                                                                       |                                                              |
| ♀ <i>hsFLP; act&gt;y<sup>+</sup>&gt;GAL4, UAS-GFP (hsFLPout&gt;&gt;)</i>              |                                                              |
| ♂ <i>w<sup>1118</sup></i>                                                             |                                                              |
| ♂ <i>w; UAS-atf3<sup>wt</sup></i>                                                     |                                                              |
| ♂ <i>w; UAS-LamC</i>                                                                  |                                                              |
| ♂ <i>eyFLP FRT19A, tubGAL80; act&gt;y<sup>+</sup>&gt;GAL4, UAS-GFP (eyFLP MARCM)</i>  |                                                              |
| ♀ <i>y w FRT19A</i>                                                                   |                                                              |
| ♀ <i>y w dlg1<sup>G0342</sup> FRT19A / FM7i, P{ActGFP}JMR3</i>                        |                                                              |
| ♀ <i>y atf3<sup>76</sup> w FRT19A / FM7i, P{ActGFP}JMR3</i>                           |                                                              |
| ♀ <i>y atf3<sup>76</sup> w dlg1<sup>G0342</sup> FRT19A / FM7i, P{ActGFP}JMR3</i>      |                                                              |
| ♀ <i>y w dlg1<sup>m52</sup> FRT19A / FM7i, P{ActGFP}JMR3</i>                          |                                                              |
| ♀ <i>y atf3<sup>76</sup> w dlg1<sup>m52</sup> FRT19A / FM7i, P{ActGFP}JMR3</i>        |                                                              |
| ♀ <i>y w dlg1<sup>G0342</sup> FRT19A / FM7i, P{ActGFP}JMR3; UAS-atf3<sup>wt</sup></i> |                                                              |
| ♀ <i>y w FRT19A; UAS-p35</i>                                                          |                                                              |
| ♀ <i>y w dlg1<sup>G0342</sup> FRT19A / FM7i, P{ActGFP}JMR3; UAS-p35</i>               |                                                              |

|                                                                                                                 |
|-----------------------------------------------------------------------------------------------------------------|
| ♀ <i>y atf3<sup>76</sup> w dlg1<sup>G0342</sup> FRT19A / FM7i, P{ActGFP}JMR3; UAS-p35</i>                       |
| ♂ <i>eyFLP FRT19A, tubGAL80; act&gt;y<sup>r</sup>&gt;GAL4, UAS-myrRFP (eyFLP MARCM)</i>                         |
| ♀ <i>y w dlg1<sup>G0342</sup> FRT19A / FM7i, P{ActGFP}JMR3;; atf3<sup>gBAC</sup>/TM6B</i>                       |
| ♀ <i>y atf3<sup>76</sup> w dlg1<sup>G0342</sup> FRT19A / FM7i, P{ActGFP}JMR3;; atf3<sup>gBAC</sup>/TM6B</i>     |
| ♀ <i>y w dlg1<sup>G0342</sup> FRT19A / FM7i, P{ActGFP}JMR3;; UAS-bsk<sup>DN</sup>, atf3<sup>gBAC</sup>/TM6B</i> |
| ♂ <i>GMR-hid y w* FRT19A; ey-GAL4, UAS-FLP (EGUF/hid)</i>                                                       |
| ♀ <i>y w FRT19A</i>                                                                                             |
| ♀ <i>y w dlg1<sup>G0342</sup> FRT19A / FM7i, P{ActGFP}JMR3</i>                                                  |
| ♀ <i>y atf3<sup>76</sup> w dlg1<sup>G0342</sup> FRT19A / FM7i, P{ActGFP}JMR3</i>                                |
| ♀ <i>eyFLP; act&gt;y<sup>r</sup>&gt;GAL4, UAS-GFP; FRT82B, tubGAL80 (eyFLP MARCM)</i>                           |
| ♂ <i>w;; FRT82B</i>                                                                                             |
| ♂ <i>w; UAS-atf3<sup>wt</sup>; FRT82B</i>                                                                       |
